# Supplementary material
Source: PubMed Central journal article supplement (PMC4255721)
Supplement: jm501027w_si_001.pdf [file jm501027w_si_001.pdf]

## Supporting Information

### 1,4-Disubstituted-[1,2,3]triazolyl-Containing Analogues of MT-II: Design, Synthesis, Conformational Analysis, and Biological Activity

Chiara Testa,<sup>†,‡,¶</sup> Mario Scrima,<sup>∇,†</sup> Manuela Grimaldi,<sup>∇</sup> Anna M. D' Ursi,<sup>∇</sup> Marvin L. Dirain,<sup>||</sup> Nadège Lubin-Germain,<sup>†</sup> Anamika Singh,<sup>||,§</sup> Carrie Haskell-Luevano,<sup>||,§</sup> Michael Chorev,<sup>\*,‡,¥</sup> Paolo Rovero,<sup>‡,¶</sup> and Anna M. Papini.<sup>\*,†,¶,‡</sup>

<sup>†</sup> Laboratoire SOSCO & PeptLab@UCP, EA4505, University of Cergy-Pontoise, 5 mail Gay-Lussac Neuville sur Oise, F-95031 Cergy-Pontoise CEDEX, France

<sup>#</sup> Department of Chemistry "Ugo Schiff", University of Florence, Via della Lastruccia 13, I-50019 Sesto Fiorentino, Italy

<sup>¶</sup> Laboratory of Peptide and Protein Chemistry and Biology, University of Florence, Via della Lastruccia 13, I-50019 Sesto Fiorentino, Italy

<sup>∇</sup> Department of Pharmacy, University of Salerno, Via Giovanni Paolo II 132, I-84084 Fisciano (Salerno), Italy

<sup>||</sup> Departments of Pharmacodynamics, University of Florida, Gainesville, 1345 Center Drive, JHMC Room P1-20 FL 32610, United States

<sup>§</sup> Medicinal Chemistry, University of Minnesota, Minneapolis, 8-101 Weaver Densford Hall, 308 Harvard Street SE MN 55455, United States

<sup>‡</sup> Laboratory for Translational Research, Harvard Medical School, One Kendall Square, Building 600, Cambridge, MA 02139, United States

<sup>¥</sup> Department of Medicine, Brigham and Women's Hospital, 75 Francis Street, Boston, MA 02115, USA

<sup>‡</sup> Department NeuroFarBa, Section of Pharmaceutical and Nutraceutical Sciences, University of Florence, Via Ugo Schiff 6, I-50019 Sesto Fiorentino, Italy

#### Synthesis of *N*<sup>α</sup>-Fmoc-ω-azido-α-amino acids and *N*<sup>α</sup>-Fmoc-ω-alkynyl-α-amino acids

*N*<sup>α</sup>-Fmoc-ω-azido-α-amino- and *N*<sup>α</sup>-Fmoc-ω-ynoic-α-amino acids with different length of the side chain, were synthesized according to the procedure described in the literature.<sup>1,2</sup> Briefly, the *N*<sup>α</sup>-Fmoc-ω-azido-α-amino acids (1-4) were synthesized by diazo-transfer reaction starting from the correspondent *N*<sup>α</sup>-protected ω-amino-α-amino acids. The *N*<sup>α</sup>-Fmoc-ω-alkynyl-α-amino acids (5-7) were synthesized by alkylation of a Ni(II) complex of the Schiff base formed between glycine and (S)-2-(N-benzylpropyl)aminobenzophenone, as a chiral inducer, with alk-ω-ynyl bromides. 2S-[[9H-Fluoren-9-ylmethoxy]carbonyl]amino]-4-pentynoic acid and Fmoc-S-Pra-OH (8) were purchased from Iris Biotech GmbH.

#### 6-Azido-2S-[[9H-fluoren-9-ylmethoxy]carbonyl]amino]hexanoic acid (6-Azido-Fmoc-L-norleucine) (1)

Yield 70%. RP-UPLC: *R*<sub>t</sub> 4.28 min (50-100% B in 5 min). IR (KBr): 2100 cm<sup>-1</sup> (N<sub>3</sub>). ESI-MS: *m/z* calcd for C<sub>21</sub>H<sub>22</sub>N<sub>4</sub>NaO<sub>4</sub> [M + Na]<sup>+</sup>: 417.15; found 417.2. [α]<sub>D</sub> = -2.5 (*c* 1.0, MeOH). <sup>1</sup>H NMR (CDCl<sub>3</sub>, 400 MHz): δ 7.74 (d, 2H, *J*<sub>3,4</sub> = *J*<sub>5,6</sub> = 7.4 Hz, fluorenyl 4-H and 5-H), 7.54 (d, 2H, *J*<sub>1,2</sub> = *J*<sub>7,8</sub> = 7.4 Hz, fluorenyl 1-H and 8-H), 7.37 (*pseudo t*, 2H, fluorenyl 3-H and 6-H), 7.28 (*pseudo t*, 2H, fluorenyl 2-H and 7-H), 6.19 (s broad, COOH), 5.46 (m, 1H, NH), 4.49–4.33 (m, 3H, CH<sub>2</sub>-O and α-H), 4.18 (t, 1H, *J* = 6.4 Hz, fluorenyl 9-H), 3.24–3.21 (m, 2H, ε-H<sub>2</sub>), 1.70–1.42 (m, 6H, 3 × CH<sub>2</sub>). <sup>13</sup>C NMR (CDCl<sub>3</sub>, 100 MHz): δ 176.97 (COOH), 156.35 (CONH), 143.75, 143.60, and 141.28 (fluorenyl C-4a, C-4b, C-8a, and C-9a), 127.74, 127.06, and 125.01 (fluorenyl C-2 and C-7), 120.00 (fluorenyl C-1 and C-8), 67.14 (CH<sub>2</sub>-O), 53.90 (C-α), 51.02 (C-ε), 47.07 (fluorenyl C-9), 31.68 (CH<sub>2</sub>), 28.31 (CH<sub>2</sub>),

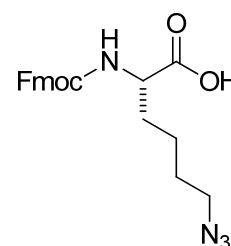

22.55 (CH<sub>2</sub>). Anal. Calcd for C<sub>21</sub>H<sub>22</sub>N<sub>4</sub>O<sub>4</sub>: C, 63.95; H, 5.62; N, 14.20. Found: C, 64.01; H, 5.58; N, 14.23.

### 5-Azido-2S-[[[(9H-fluoren-9-ylmethoxy)carbonyl]amino] pentanoic acid (5-azido-Fmoc-L-Norvaline) (2)

Yield 83%. RP-UPLC: *R<sub>t</sub>* 3.81 min (50-100% B in 5 min). IR (KBr): 2100 (N<sub>3</sub>) cm<sup>-1</sup>. ESI-MS: *m/z* calcd for C<sub>20</sub>H<sub>20</sub>N<sub>4</sub>NaO<sub>4</sub> [M + Na]<sup>+</sup> 403.14; found 403.3. [α]<sub>D</sub> = -2.3 (*c* 1.0, MeOH). <sup>1</sup>H NMR (CDCl<sub>3</sub>, 400 MHz): δ 7.76 (d, 2H, *J*<sub>3,4</sub> = *J*<sub>5,6</sub> = 7.6 Hz, fluorenyl 4-H and 5-H), 7.61 (*pseudo* d, 2H, *J*<sub>1,2</sub> = *J*<sub>7,8</sub> = 7.6 Hz, fluorenyl 1-H and 8-H), 7.40 (*pseudo* t, 2H, fluorenyl 3-H and 6-H), 7.31 (*pseudo* t, 2H, fluorenyl 2-H and 7-H), 6.16 (s broad, COOH), 5.34 (m, 1H, NH), 4.45–4.40 (m, 3H, CH<sub>2</sub>-O and α-H), 4.22 (t, 1H, *J* = 6.6 Hz, fluorenyl 9-H), 3.37–3.30 (m, 2H, δ-H<sub>2</sub>), 2.01–1.46 (m, 4H, 2 × CH<sub>2</sub>). <sup>13</sup>C NMR (CDCl<sub>3</sub>, 100 MHz): δ 175.72 (COOH), 156.72 (CONH), 143.75, 143.57, and 141.33 (fluorenyl C-4a, C-4b, C-8a, and C-9a), 127.76, 127.08, and 125.00 (fluorenyl C-2 and C-7), 120.02 (fluorenyl C-1 and C-8), 67.12 (CH<sub>2</sub>-O), 53.16 (C-α), 50.76 (C-δ), 47.15 (fluorenyl C-9), 29.62 (CH<sub>2</sub>), 24.81 (CH<sub>2</sub>). Anal. Calcd for C<sub>20</sub>H<sub>20</sub>N<sub>4</sub>O<sub>4</sub>: C, 63.15; H, 5.30; N, 14.73. Found: C, 63.09; H, 5.25; N, 14.80.

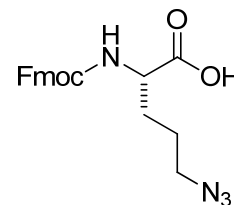

### 4-Azido-2S-[[[(9H-fluoren-9-ylmethoxy) carbonyl]amino] butanoic acid (Fmoc-Abu(γ-N<sub>3</sub>)-OH) (3)

Yield 89%. RP-UPLC: *R<sub>t</sub>* 3.34 min (50-100% B in 5 min). IR: 2100 cm<sup>-1</sup> (N<sub>3</sub>). ESI-MS: *m/z* calcd for C<sub>19</sub>H<sub>18</sub>N<sub>4</sub>NaO<sub>4</sub> [M + Na]<sup>+</sup> 389.12; found 389.4. [α]<sub>D</sub> = -11.5 (*c* 1.0, MeOH). <sup>1</sup>H NMR (CDCl<sub>3</sub>, 400 MHz): δ 7.75 (*pseudo* d, 2H, *J* = 7.6 Hz, fluorenyl 4-H and 5-H), 7.54 (*pseudo* d, 2H, *J* = 7.4 Hz, fluorenyl 1-H and 8-H), 7.39 (*pseudo* t, 2H, fluorenyl 3-H and 6-H), 7.31 (*pseudo* t, 2H, fluorenyl 2-H and 7-H), 6.14 (s broad, COOH), 5.63 (m, 1H, NH), 4.53–4.41 (m, 3H, CH<sub>2</sub>-O and α-H), 4.21 (t, 1H, *J* = 6.8 Hz, fluorenyl 9-H), 3.42–3.39 (m, 2H, γ-H<sub>2</sub>), 2.19–1.96 (m, 6H, 3 × CH<sub>2</sub>). <sup>13</sup>C NMR (CDCl<sub>3</sub>, 100 MHz): δ 172.71 (COOH), 156.26 (CONH), 143.53 and 141.29 (fluorenyl C-4a, C-4b, C-8a, and C-9a), 127.76, 127.08, 125.04, 124.99 (fluorenyl C-2, C-7), 120.00 (fluorenyl C-1, C-8), 67.17 (CH<sub>2</sub>-O), 51.70 (C-α), 47.68 (C-γ), 47.09 (fluorenyl C-9), 31.21 (CH<sub>2</sub>). Anal. Calcd for C<sub>19</sub>H<sub>18</sub>N<sub>4</sub>O<sub>4</sub>: C, 62.29; H, 4.95; N, 15.29. Found: C, 62.36; H, 4.99; N, 15.24.

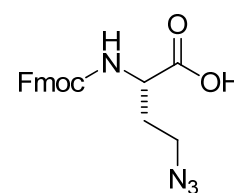

### 3-Azido-2S-[[[(9H-fluoren-9-ylmethoxy)carbonyl]amino] propanoic acid (3-Azido-Fmoc-L-Alanine) (4)

Yield 75 %. RP-UPLC: *R<sub>t</sub>* 4.02 min (50-100% B in 5 min). IR: 2100 cm<sup>-1</sup> (N<sub>3</sub>). ESI-MS: *m/z* calcd for C<sub>18</sub>H<sub>16</sub>N<sub>4</sub>NaO<sub>4</sub> [M + Na]<sup>+</sup> 375.12; found 375.4. <sup>1</sup>H NMR (CDCl<sub>3</sub>, 400 MHz): δ 7.70 (*pseudo* d, 2H, *J* = 7.4 Hz, fluorenyl 4-H and 5-H), 7.48 (*pseudo* d, 2H, *J* = 7.6 Hz, fluorenyl 1-H and 8-H), 7.40 (*pseudo* t, 2H, fluorenyl 3-H and 6-H), 7.28 (*pseudo* t, 2H, fluorenyl 2-H and 7-H), 6.3 (s broad, COOH), 5.78 (m, 1H, NH), 4.57–4.45 (m, 3H, CH<sub>2</sub>-O and α-H), 4.32 (t, 1H, *J* = 6.8 Hz, fluorenyl 9-H), 3.52–3.35 (m, 2H, γ-H<sub>2</sub>). Anal. Calcd for C<sub>18</sub>H<sub>16</sub>N<sub>4</sub>O<sub>4</sub>: C, 61.36; H, 4.58; N, 15.90. Found: C, 61.46; H, 4.98; N, 15.68.

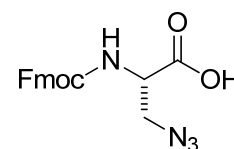

**2S-[[9H-Fluoren-9-ylmethoxy]carbonyl]amino]-7-octynoic acid (5)**

Yield 38%. TLC: R<sub>f</sub> 0.5 (DCM/MeOH 10:1). RP-UPLC: R<sub>t</sub> 4.12 min (50–100% B in 5 min). ESI-MS: *m/z* calcd for C<sub>23</sub>H<sub>23</sub>NNaO<sub>4</sub> [M + Na]<sup>+</sup> 400.15; found 400.3. [α]<sub>D</sub> = -3.1 (*c* 1.0, MeOH). <sup>1</sup>H NMR (CDCl<sub>3</sub>, 400 MHz): δ 7.75 (*pseudo* d, 2H, *J* = 7.6 Hz, fluorenyl 4-H and 5-H), 7.59 (*pseudo* d, 2H, *J* = 7.6 Hz, fluorenyl 1-H and 8-H), 7.37 (*pseudo* t, 2H, fluorenyl 3-H and 6-H), 7.28 (*pseudo* t, 2H, fluorenyl 3-H and 6-H), 5.79 (broad s, COOH), 5.48 (m, 1H, NH), 4.44–4.38 (m, 3H, CH<sub>2</sub>-O and α-H), 4.21 (t, 1H, *J* = 6.8 Hz, fluorenyl 9-H), 2.08–1.99 (m, 3H), 1.94 (t, 1H, *J* = 2.4 Hz, HC≡C), 1.80–1.75 (m, 1H), 1.58–1.42 (m, 4H, 2 × CH<sub>2</sub>). <sup>13</sup>C NMR (CDCl<sub>3</sub>, 100 MHz): δ 176.63 (COOH), 156.17 (CONH), 143.83, 143.67 and 141.29 (fluorenyl C-4a, C-4b, C-8a, and C-9a), 127.71, 127.06, 125.04 (fluorenyl C-2 to C-7), 119.98 (fluorenyl C-1 and C-8), 83.97 (HC≡C), 68.69 (CH<sub>2</sub>-O), 67.06 (HC≡C), 53.83 (C-α), 47.15 (fluorenyl C-9), 31.73 and 27.81 (C-β and δ), 24.31 (C-γ), 18.15 (C-ε).

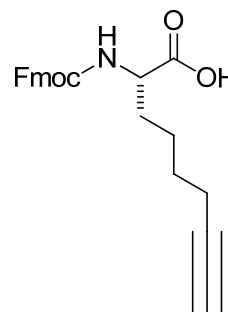**2S-[[9H-Fluoren-9-ylmethoxy]carbonyl]amino]-6-heptynoic acid (6)**

Yield 28%. TLC: R<sub>f</sub> 0.47 (DCM/MeOH 9:1). RP-UPLC: R<sub>t</sub> 3.54 min (50–100% B in 5 min). ESI-MS: *m/z* calcd for C<sub>22</sub>H<sub>21</sub>NNaO<sub>4</sub> [M + Na]<sup>+</sup> 386.14; found 386.2. [α]<sub>D</sub> = -3.0 (*c* 1.0, MeOH). <sup>1</sup>H NMR (CDCl<sub>3</sub>, 400 MHz): δ 7.73 (d, 2H, *J* = 7.2 Hz, fluorenyl 4-H and 5-H), 7.57 (d, 2H, *J* = 7.4 Hz, fluorenyl 1-H and 8-H), 7.39 (*pseudo* t, 2H, fluorenyl 3-H and 6-H), 7.30 (*pseudo* t, 2H, fluorenyl 2-H and 7-H), 6.60 (broad s, COOH), 5.51 (m, 1H, NH), 4.43–4.35 (m, 3H, CH<sub>2</sub>-O and α-H), 4.18 (t, 1H, *J* = 6.6 Hz, fluorenyl 9-H), 2.08–1.99 (m, 3H), 1.94 (t, 1H, *J* = 2.4 Hz, HC≡C), 1.80–1.75 (m, 1H), 1.58–1.42 (m, 2H, CH<sub>2</sub>). <sup>13</sup>C NMR (CDCl<sub>3</sub>, 100 MHz): δ 177.06 (COOH), 156.26 (CONH), 143.81, 143.62 and 141.27 (fluorenyl C-4a, C-4b, C-8a, and C-9a), 127.70, 127.06 and 125.05 (fluorenyl C-2 to C-7), 119.96 (fluorenyl C-1 and C-8), 83.49 (HC≡C), 69.11 (CH<sub>2</sub>-O), 67.06 (HC≡C), 53.77 (C-α), 47.11 (fluorenyl C-9), 31.33 (C-β), 24.28 (C-γ), 18.01 (C-δ).

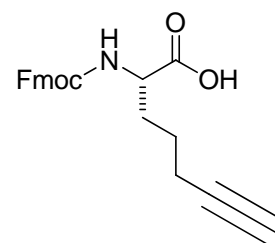**2S-[[9H-fluoren-9-ylmethoxy]carbonyl]amino]-5-hexynoic acid (7)**

Yield 32%. RP-UPLC: R<sub>t</sub> 3.37 min (50–100% B in 5 min). ESI-MS: *m/z* calcd for C<sub>21</sub>H<sub>19</sub>NNaO<sub>4</sub> [M + Na]<sup>+</sup> 372.14; found 372. <sup>1</sup>H NMR (CDCl<sub>3</sub>, 400 MHz): d 7.73 (d, 2H, *J* = 7.2 Hz, fluorenyl 4-H and 5-H), 7.56 (d, 2H, *J* = 7.3 Hz, fluorenyl 1-H and 8-H), 7.37 (*pseudo* t, 2H, fluorenyl 3-H and 6-H), 7.30 (*pseudo* t, 2H, fluorenyl 2-H and 7-H), 6.71 (s broad, COOH), 5.8 (m, 1H, NH), 4.48–4.30 (m, 3H, CH<sub>2</sub>-O and α-H), 4.21 (t, 1H, *J* = 6.7 Hz, fluorenyl 9-H), 2.45–2.31 (m, 3H), 2.22–2.10 (m, 1H), 2.00 (t, 1H, *J* = 2.1 Hz, HC≡C).

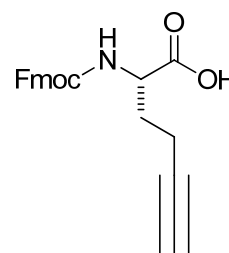

**Table 1s.** Backbone dihedral angles: Mean values of  $\psi$  and  $\phi$  angles relative to the most representative MT-II conformers.

| <b>Backbone Dihedrals</b> |                                                              |            |            |
|---------------------------|--------------------------------------------------------------|------------|------------|
| <b>MT-II analog IA</b>    | <b>Residue</b>                                               | <b>Phi</b> | <b>Psi</b> |
|                           | <b>Nle<sup>4</sup></b>                                       | -          | -          |
|                           | <b>Pra<sup>5</sup></b>                                       | -42.03     | -25.08     |
|                           | <b>His<sup>6</sup></b>                                       | -112.09    | 58.51      |
|                           | <b>D-Phe<sup>7</sup></b>                                     | -168.5     | -36.63     |
|                           | <b>Arg<sup>8</sup></b>                                       | -109.84    | 5.61       |
|                           | <b>Trp<sup>9</sup></b>                                       | -138.45    | -66.72     |
|                           | <b>Nle(<math>\epsilon</math>-N<sub>3</sub>)<sup>10</sup></b> | -          | -          |
| <b>MT-II analog IV</b>    |                                                              |            |            |
|                           | <b>Nle<sup>4</sup></b>                                       | -          | -          |
|                           | <b>Oct(7yl)<sup>5</sup></b>                                  | -77.94     | 73.72      |
|                           | <b>His<sup>6</sup></b>                                       | -175.17    | -53.06     |
|                           | <b>D-Phe<sup>7</sup></b>                                     | -57.43     | -17.87     |
|                           | <b>Arg<sup>8</sup></b>                                       | -114.27    | -11.7      |
|                           | <b>Trp<sup>9</sup></b>                                       | 45.88      | 30.26      |
|                           | <b>Ala(<math>\beta</math>-N<sub>3</sub>)<sup>10</sup></b>    | -          | -          |
| <b>MT-II analog V</b>     |                                                              |            |            |
|                           | <b>Nle<sup>4</sup></b>                                       | -          | -          |
|                           | <b>Nle(<math>\epsilon</math>-N<sub>3</sub>)<sup>5</sup></b>  | -160.14    | -38.82     |
|                           | <b>His<sup>6</sup></b>                                       | -85.92     | -32.61     |
|                           | <b>D-Phe<sup>7</sup></b>                                     | -44.39     | -30.89     |
|                           | <b>Arg<sup>8</sup></b>                                       | -130.48    | -13.26     |
|                           | <b>Trp<sup>9</sup></b>                                       | 68.88      | 8.26       |
|                           | <b>Pra<sup>10</sup></b>                                      | -          | -          |

**Table 2s.** Proton chemical shifts of [1,2,3]triazolyl-containing cyclopeptides IA in DMSO-d<sub>6</sub> at 300 K.

| Residue                              | NH    | C <sup>α</sup> H | C <sup>β</sup> H       | C <sup>γ</sup> H | C <sup>δ</sup> H | Others                                                         | Δα     |
|--------------------------------------|-------|------------------|------------------------|------------------|------------------|----------------------------------------------------------------|--------|
| Nle <sup>4</sup>                     | 7.789 | 4.299            | Qβ 1.831               | Qγ 1.745         | Qδ 1.621         | Qε 1.237                                                       |        |
| Pra <sup>5</sup>                     | 8.168 | 4.120            | Hβ2 2.921<br>Hβ3 2.453 |                  |                  |                                                                |        |
| His <sup>6</sup>                     | 8.332 | 4.244            | Qβ 2.436               |                  | Hδ2 5.890        | Hε1 9.456                                                      | -0.386 |
| D-Phe <sup>7</sup>                   | 7.665 | 4.876            | Qβ 3.647               |                  | Qδ 7.296         | Qε 6.891                                                       | 0.216  |
| Arg <sup>8</sup>                     | 8.185 | 3.962            | Hβ2 1.889<br>Hβ3 1.708 | Qγ 1.570         | Qδ 3.197         | Hε 7.660                                                       | -0.418 |
| Trp <sup>9</sup>                     | 9.175 | 4.855            | Hβ2 2.893<br>Hβ3 2.765 |                  | Hδ1 6.952        | Hε1 10.791<br>Hε3 7.174<br>HH2 7.071<br>HZ2 7.529<br>HZ3 7.333 | 0.155  |
| Nle(ε-N <sub>3</sub> ) <sup>10</sup> | 8.848 | 3.752            | Qβ 1.958               | Qγ 1.252         | Qδ 1.347         | Qε 1.822<br>HZ 7.083                                           |        |

**Table 3s.** Proton chemical shifts of [1,2,3]triazolyl-containing cyclopeptides IB in DMSO-d6 at 300 K.

| <b>Residue</b>                           | <b>NH</b> | <b>C<sup>α</sup>H</b> | <b>C<sup>β</sup>H</b>                | <b>C<sup>γ</sup>H</b> | <b>C<sup>δ</sup>H</b> | <b>Others</b>                                             |
|------------------------------------------|-----------|-----------------------|--------------------------------------|-----------------------|-----------------------|-----------------------------------------------------------|
| <b>Nle<sup>4</sup></b>                   | 8.108     | 4.222                 | <b>Qβ</b> 1.617                      | <b>Qγ</b> 1.478       | <b>Qδ</b> 1.228       | <b>Qε</b> 0.853                                           |
| <b>Pra<sup>5</sup></b>                   | 7.917     | 4.651                 | <b>Hβ2</b> 3.174<br><b>Hβ3</b> 3.037 |                       |                       |                                                           |
| <b>His<sup>6</sup></b>                   | 8.313     | 4.298                 | <b>Qβ</b> 2.724                      |                       | <b>Hδ2</b> 6.862      | <b>Hε1</b> 7.258                                          |
| <b>D-Phe<sup>7</sup></b>                 | 8.600     | 4.281                 | <b>Hβ2</b> 3.177<br><b>Hβ3</b> 2.849 |                       |                       |                                                           |
| <b>Arg<sup>8</sup></b>                   | 8.716     | 4.205                 | <b>Hβ2</b> 1.658<br><b>Hβ3</b> 1.538 | <b>Qγ</b> 1370        | <b>Qδ</b> 3.014       | <b>Hε</b> 7.544<br><b>QH2</b> 7.674                       |
| <b>Trp<sup>9</sup></b>                   | 8.083     | 4.505                 | <b>Hβ2</b> 3.203<br><b>Hβ3</b> 3.022 |                       | <b>Hδ1</b> 7.233      | <b>Hε1</b> 10.028<br><b>Hε3</b> 7.778<br><b>HH2</b> 7.372 |
| <b>Nle(ε-N<sub>3</sub>)<sup>10</sup></b> | 7.787     | 4.229                 | <b>Qβ</b> 1.771                      | <b>Qγ</b> 1.240       | <b>Qδ</b> 1.625       | <b>Qε</b> 3.039                                           |

**Table 4s.** Proton chemical shifts of [1,2,3]triazolyl-containing cyclopeptides IV in DMSO-d6 at 300 K.

| <b>Residue</b>                           | <b>NH</b> | <b>C<sup>α</sup>H</b> | <b>C<sup>β</sup>H</b>                | <b>C<sup>γ</sup>H</b>                | <b>C<sup>δ</sup>H</b> | <b>Others</b>                                                                                     |
|------------------------------------------|-----------|-----------------------|--------------------------------------|--------------------------------------|-----------------------|---------------------------------------------------------------------------------------------------|
| <b>Nle<sup>4</sup></b>                   | 8.080     | 4.212                 | <b>Qβ</b> 1.518                      | <b>Qγ</b> 1.745                      | <b>Qδ</b> 1.252       | <b>Qε</b> 0.873                                                                                   |
| <b>Oct(7yl)<sup>5</sup></b>              | 7.980     | 4.212                 | <b>Qβ</b> 1.931                      | <b>Hγ2</b> 1.623<br><b>Hγ3</b> 1.716 | <b>Qδ</b> 1.284       | <b>Qε</b> 1.484                                                                                   |
| <b>His<sup>6</sup></b>                   | 8.438     | 4.528                 | <b>Hβ2</b> 2.959<br><b>Hβ3</b> 2.792 |                                      | <b>Hδ2</b> 7.173      | <b>Hε1</b> 10.826                                                                                 |
| <b>D-Phe<sup>7</sup></b>                 | 8.376     | 4.615                 | <b>Hβ2</b> 3.038<br><b>Hβ3</b> 2.763 | <b>Qγ</b> 1.379                      | <b>Qδ</b> 7.218       |                                                                                                   |
| <b>Arg<sup>8</sup></b>                   | 7.933     | 4.278                 | <b>Hβ2</b> 1.667<br><b>Hβ3</b> 1.519 | <b>Qγ</b> 1.379                      | <b>Qδ</b> 3.055       | <b>Hε</b> 7.603                                                                                   |
| <b>Trp<sup>9</sup></b>                   | 8.192     | 4.565                 | <b>Hβ2</b> 3.139<br><b>Hβ3</b> 3.021 |                                      | <b>Hδ1</b> 7.282      | <b>Hε1</b> 10.890<br><b>Hε3</b> 7.637<br><b>HH2</b> 7.186<br><b>HZ2</b> 7.359<br><b>HZ3</b> 7.359 |
| <b>Ala(β-N<sub>3</sub>)<sup>10</sup></b> | 8.368     | 4.670                 | 2.814                                |                                      |                       |                                                                                                   |

**Table 5s.** Proton chemical shifts of [1,2,3]triazolyl-containing cyclopeptides V in DMSO-d<sub>6</sub> at 300 K.

| Residue                             | NH    | C <sup>α</sup> H | C <sup>β</sup> H       | C <sup>γ</sup> H | C <sup>δ</sup> H | Others                                            |
|-------------------------------------|-------|------------------|------------------------|------------------|------------------|---------------------------------------------------|
| Nle <sup>4</sup>                    | 8.052 | 4.244            | Qβ 1.639               | Qγ 1.527         | Qδ 1.275         | Qε 0.880                                          |
| Nle(ε-N <sub>3</sub> ) <sup>5</sup> | 7.973 | 4.295            | Hβ2 1.803<br>Hβ3 1.752 | Qγ 1.229         | Qδ1 6.14         | HZ 7.871<br>Qε 3.037                              |
| His <sup>6</sup>                    | 8.188 | 4.576            | Hβ2 3.218<br>Hβ3 3.038 |                  | Hδ2 6.726        | Hε1 7.320                                         |
| D-Phe <sup>7</sup>                  | 8.102 | 4.557            | Hβ2 3.057<br>Hβ3 2.891 |                  |                  |                                                   |
| Arg <sup>8</sup>                    | 8.192 | 4.226            | Hβ2 1.654<br>Hβ3 1.552 | Qγ 1.408         | Qδ 3.041         | Hε 7.423<br>QH2 7.242                             |
| Trp <sup>9</sup>                    | 8.341 | 4.450            | Hβ2 3.204<br>Hβ3 3.021 |                  | Hδ1 7.386        | Hε1 10.852<br>Hε3 7.672<br>HH2 7.115<br>HZ3 7.041 |
| Pra <sup>10</sup>                   | 8.379 | 4.348            | Hβ2 3.111<br>Hβ3 2.766 |                  |                  |                                                   |

References:

- 
- (1) Le Chevalier Isaad, A.; Papini, A. M.; Chorev, M.; Rovero, P. *J. Pept. Sci.* **2009**, *15*, 451–454.  
(2) Le Chevalier Isaad, A.; Barbetti, F.; Rovero, P.; D’Ursi, A. M.; Chelli, M.; Chorev, M.; Papini, A. M. *Eur. J. Org. Chem.* **2008**, *31*, 5308-5314.
